# Supplementary material
Source: PubMed Central journal article supplement (PMC6640245)
Supplement: MPP-12-746-s003.pdf [file MPP-12-746-s003.pdf]

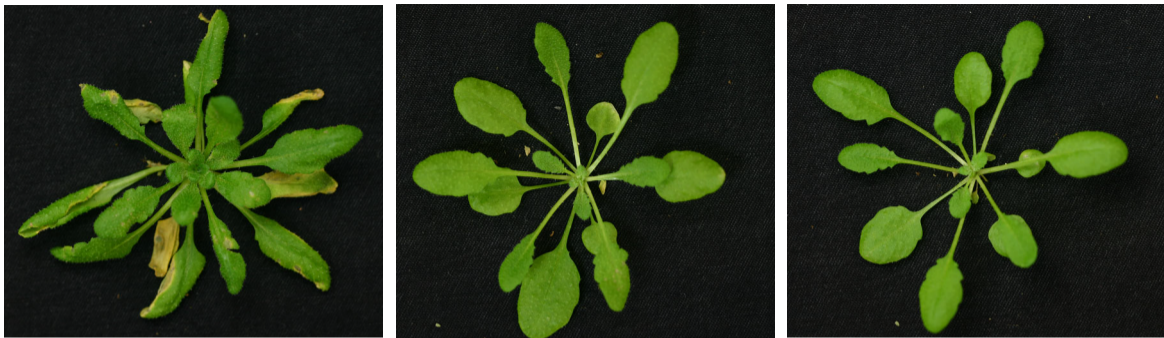

**Fig. S2.** Complementation of the *edr1* mutation with *EDR1-sYFP*. The left panel shows an untransformed *edr1* mutant 10 days after withholding water. Note rapid senescence of older leaves and yellow lesions on younger leaves. The right two panels are representative plants from two independent transgenic lines expressing *EDR1-sYFP* fusion protein under control of the native *EDR1* promoter. Plants were grown in parallel and received identical drought treatments.
